# Supplementary material for: Endogenous control of inflammation characterizes pregnant women with asymptomatic or paucisymptomatic SARS-CoV-2 infection
Source: PubMed Central journal article supplement (PMC8322155; doi:10.1038/s41467-021-24940-w), 2021-07-29
Supplement: 41467_2021_24940_MOESM1_ESM.pdf [file 41467_2021_24940_MOESM1_ESM.pdf]

# Supplementary Figures

De Biasi et al.

Endogenous control of inflammation characterizes  
pregnant women with asymptomatic or mild SARS-CoV-2 infection

A

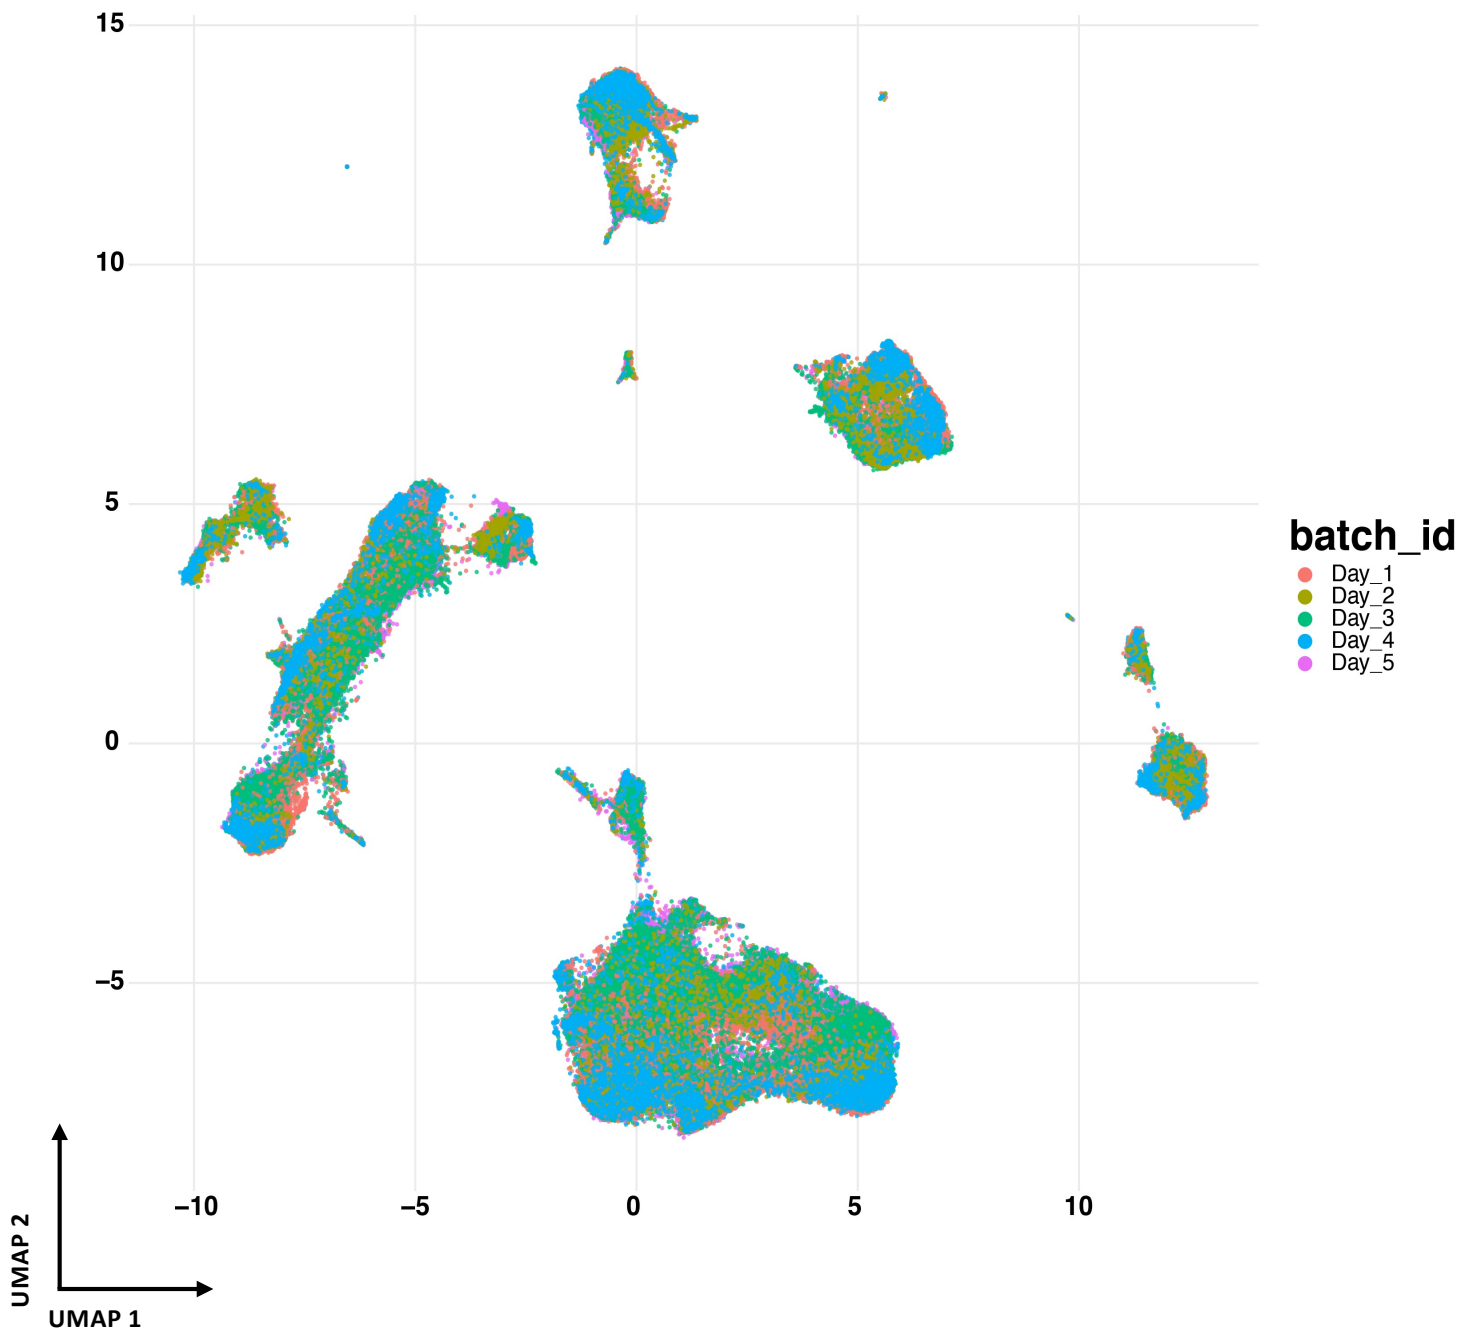

**Supplementary Figure 1A.**

UMAP graph overlaid for multiple batches (referred to different acquisition days).

B

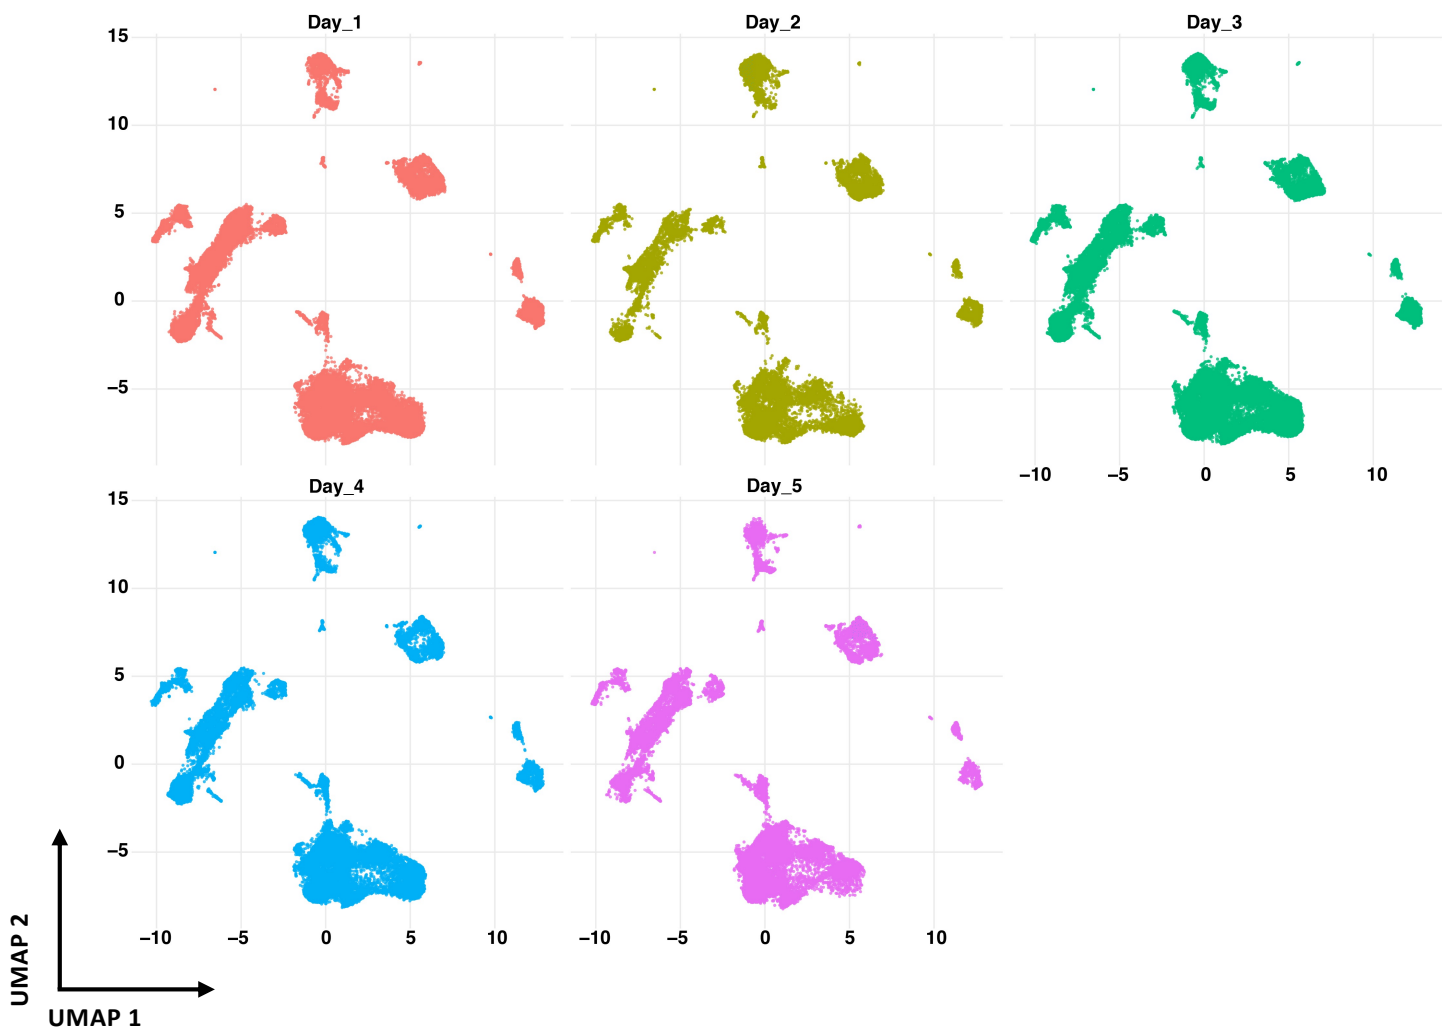

**Supplementary Figure 1B.**

Projection of UMAP graph stratified by batch; each color indicates a different day.

A

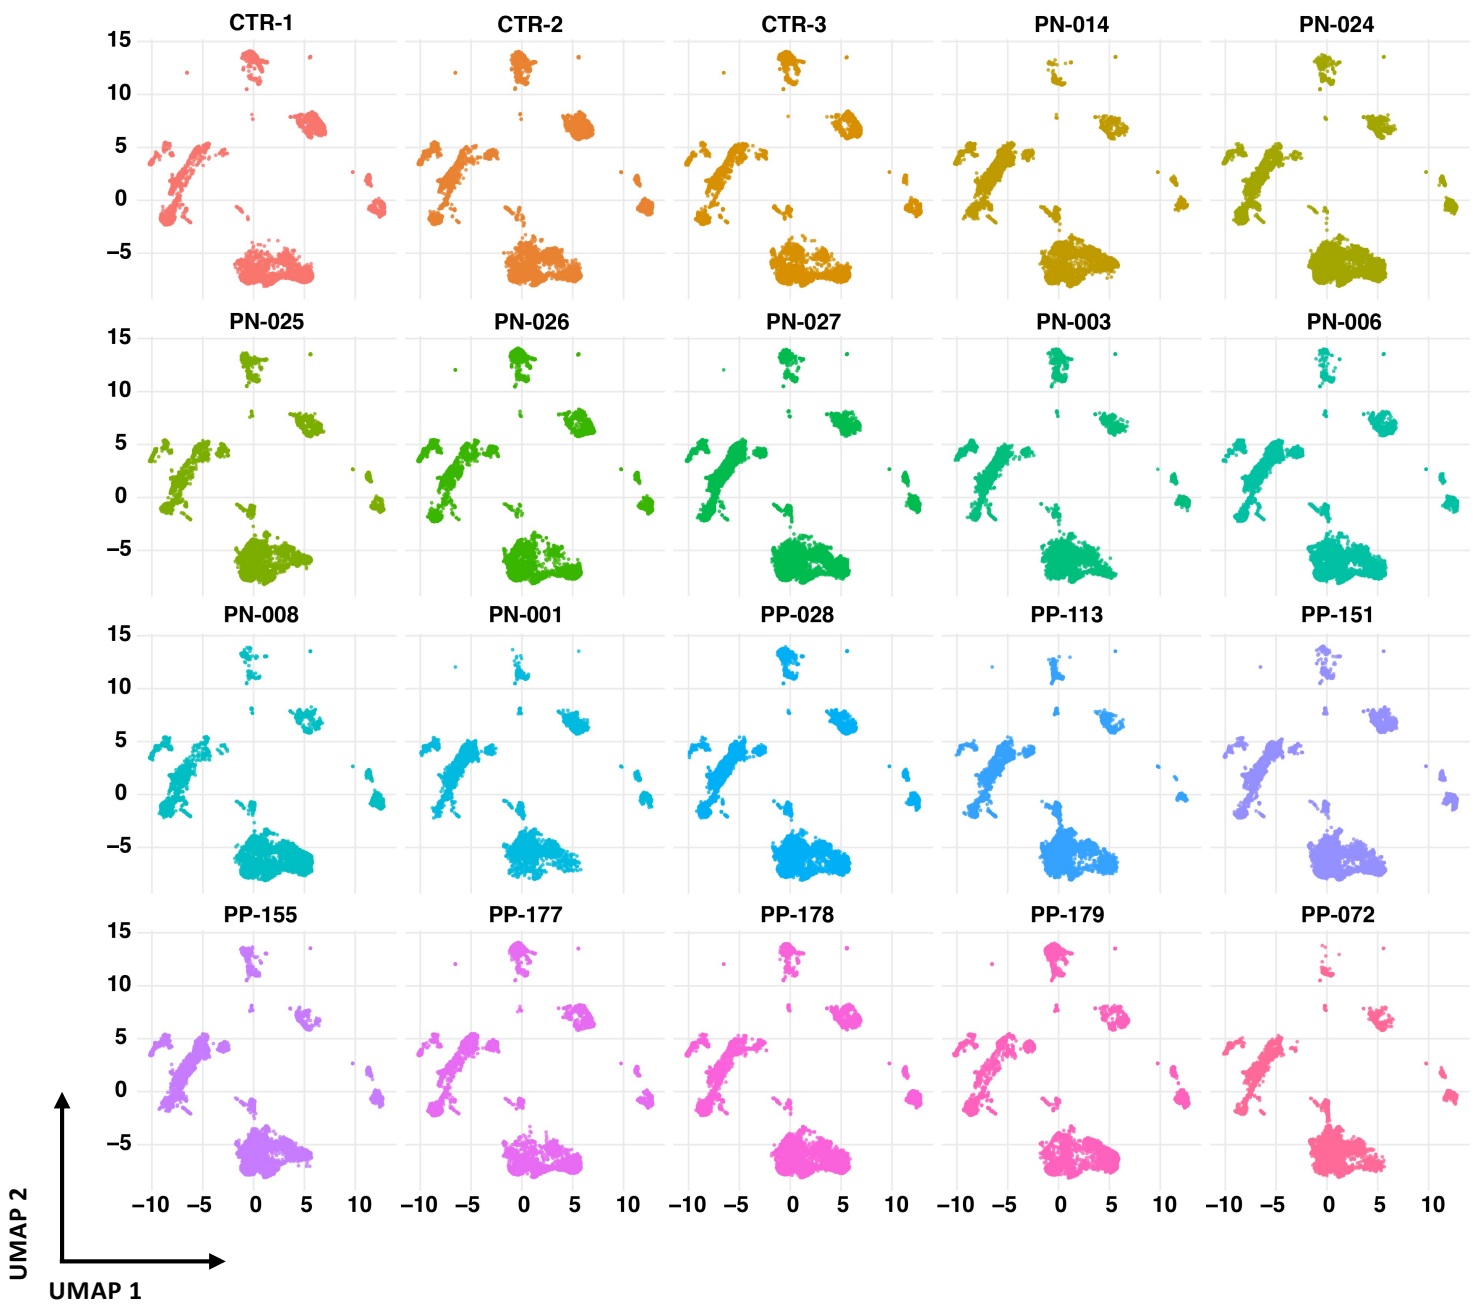

**Supplementary Figure 2A.**

UMAP graphs stratified by patient (CTR, healthy controls; PN, pregnant negative; PP, pregnant positive).

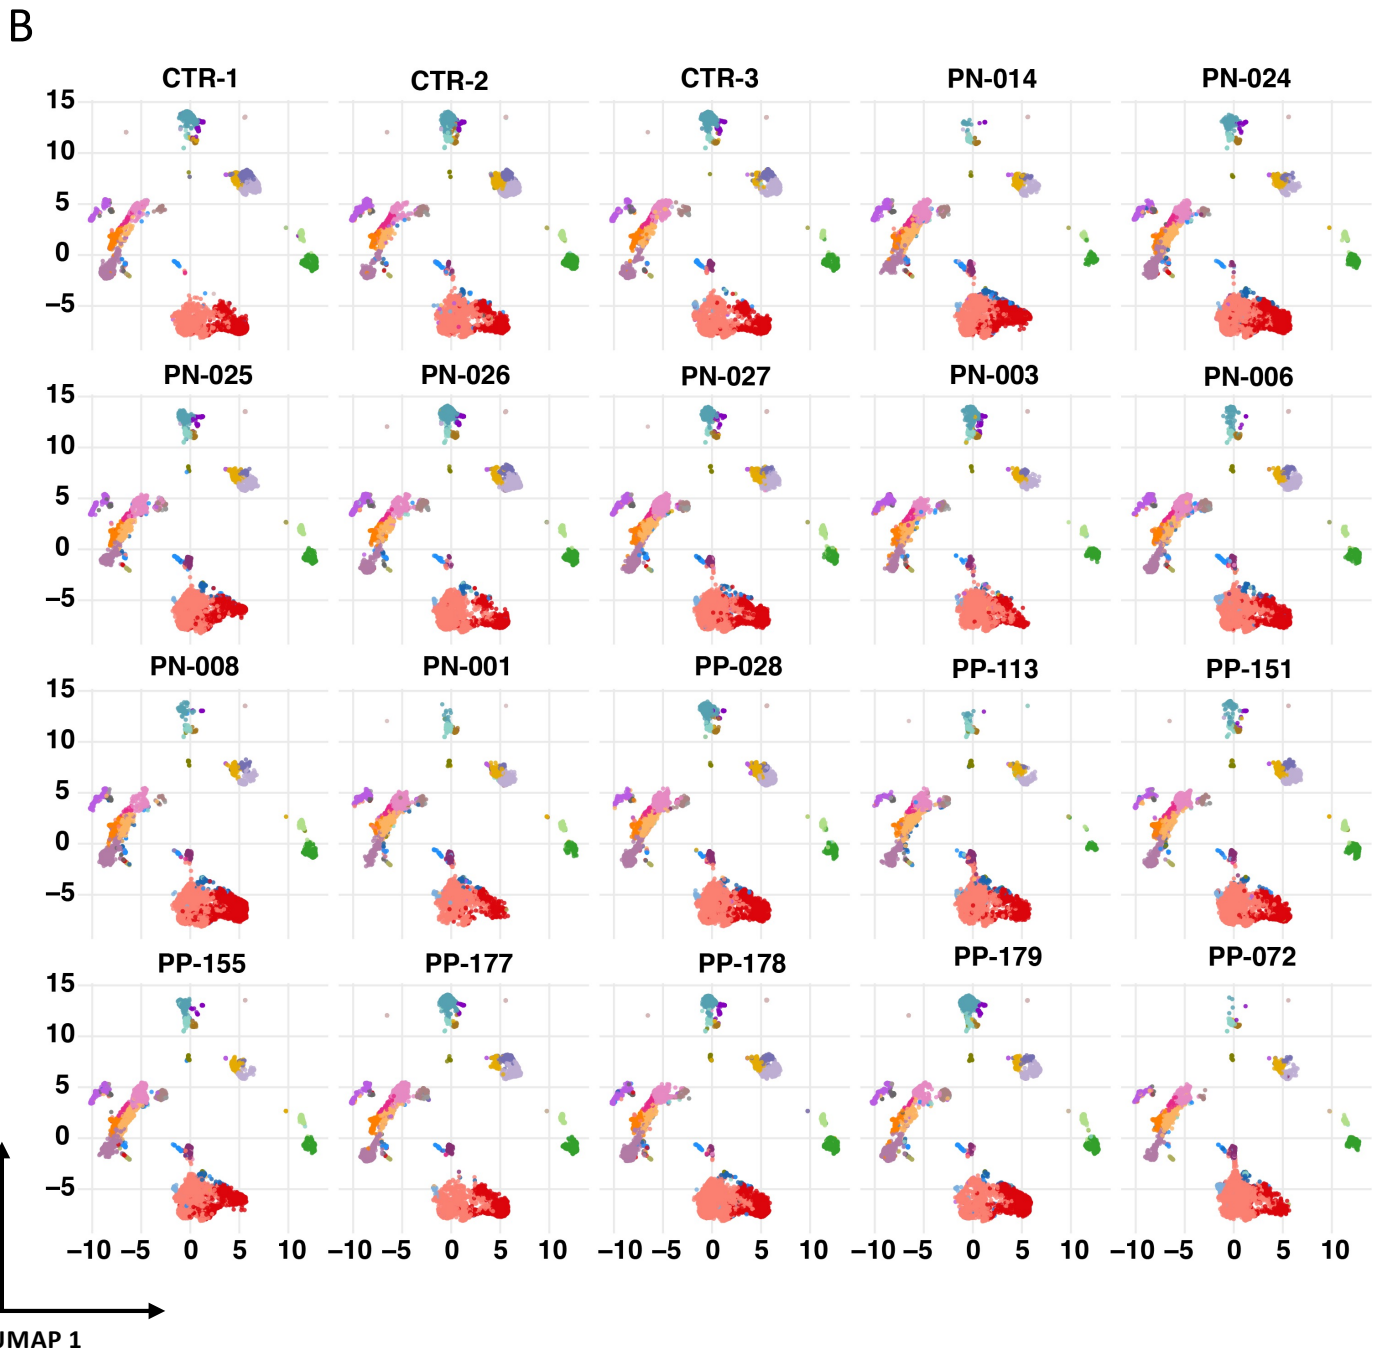

**Supplementary Figure 2B.**

Projection of UMAP graphs stratified by patient showing the FlowSOM clusters (CTR, healthy controls; PN, pregnant negative; PP, pregnant positive).

A

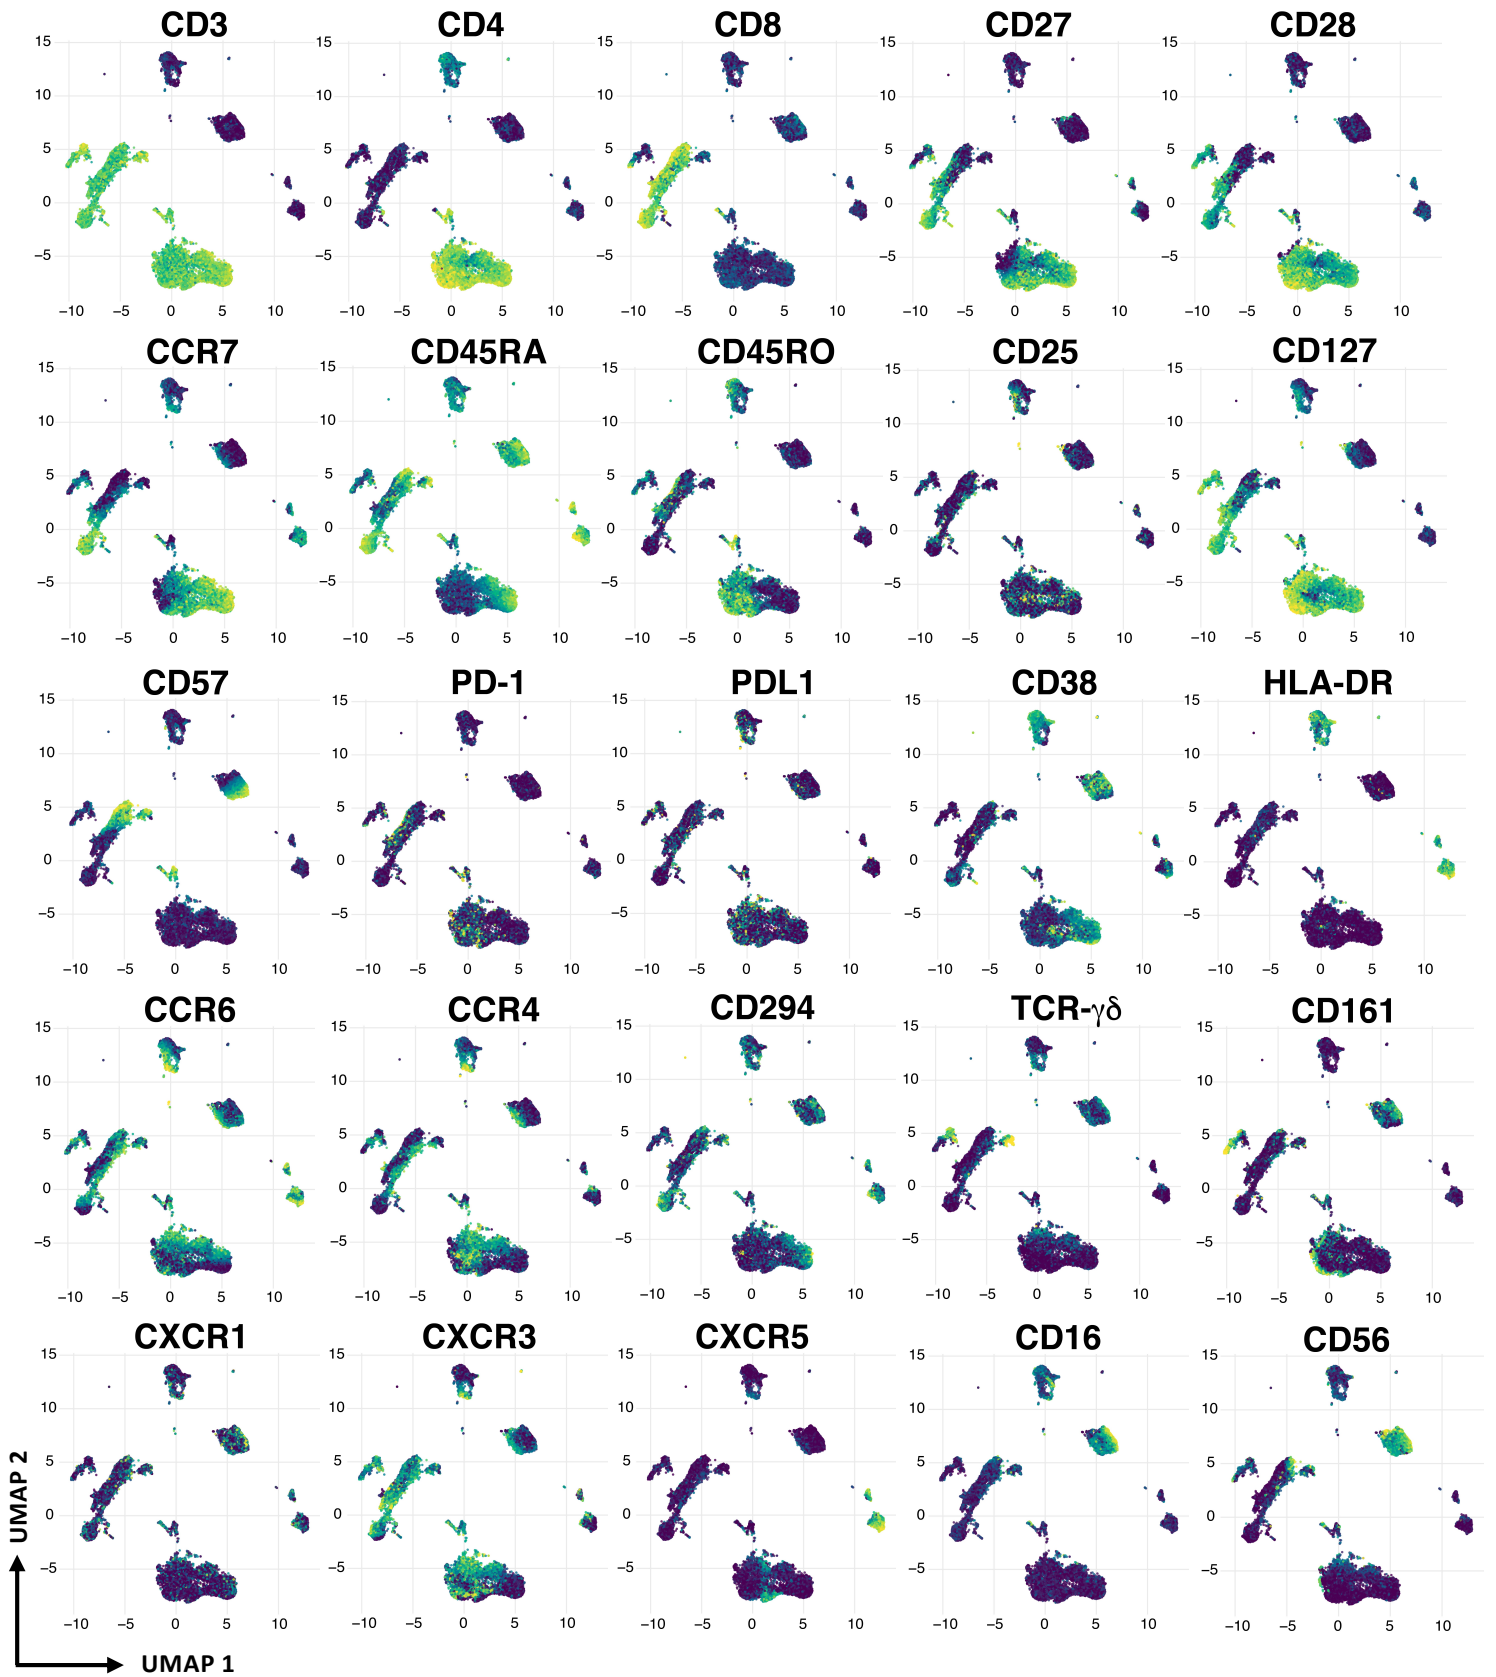

Supplementary Figure 3A.

UMAP graphs colored by the expression of 38 markers used for PBMC phenotyping.

B

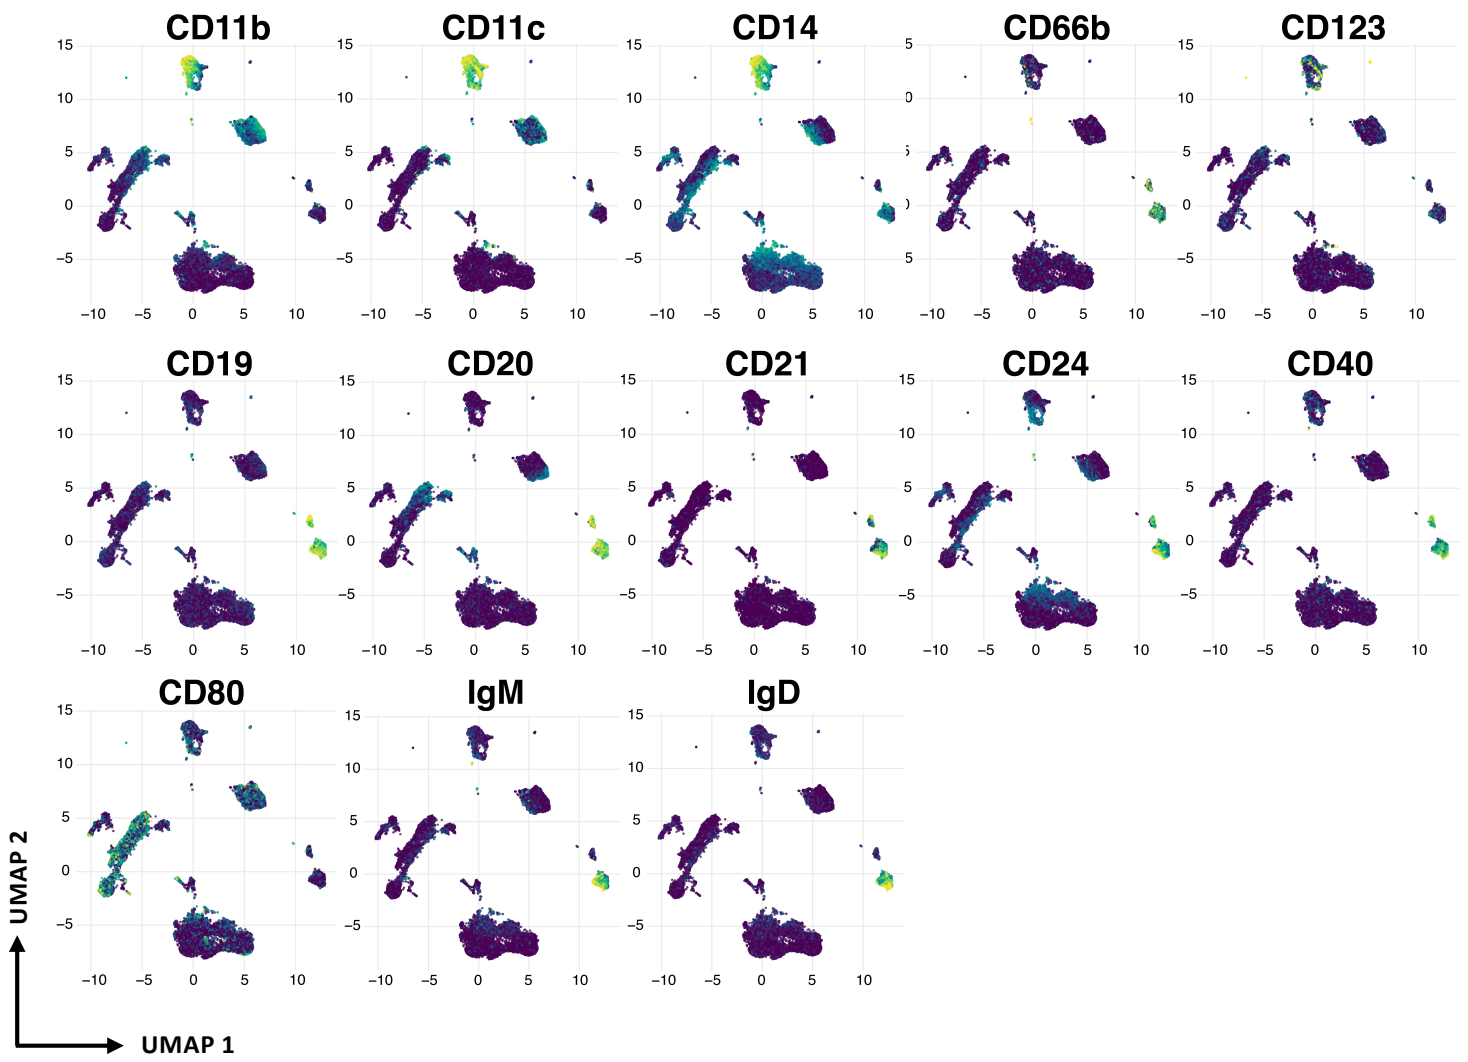

**Supplementary Figure 3B.**

UMAP graphs colored by the expression of 38 markers used for PBMC phenotyping.

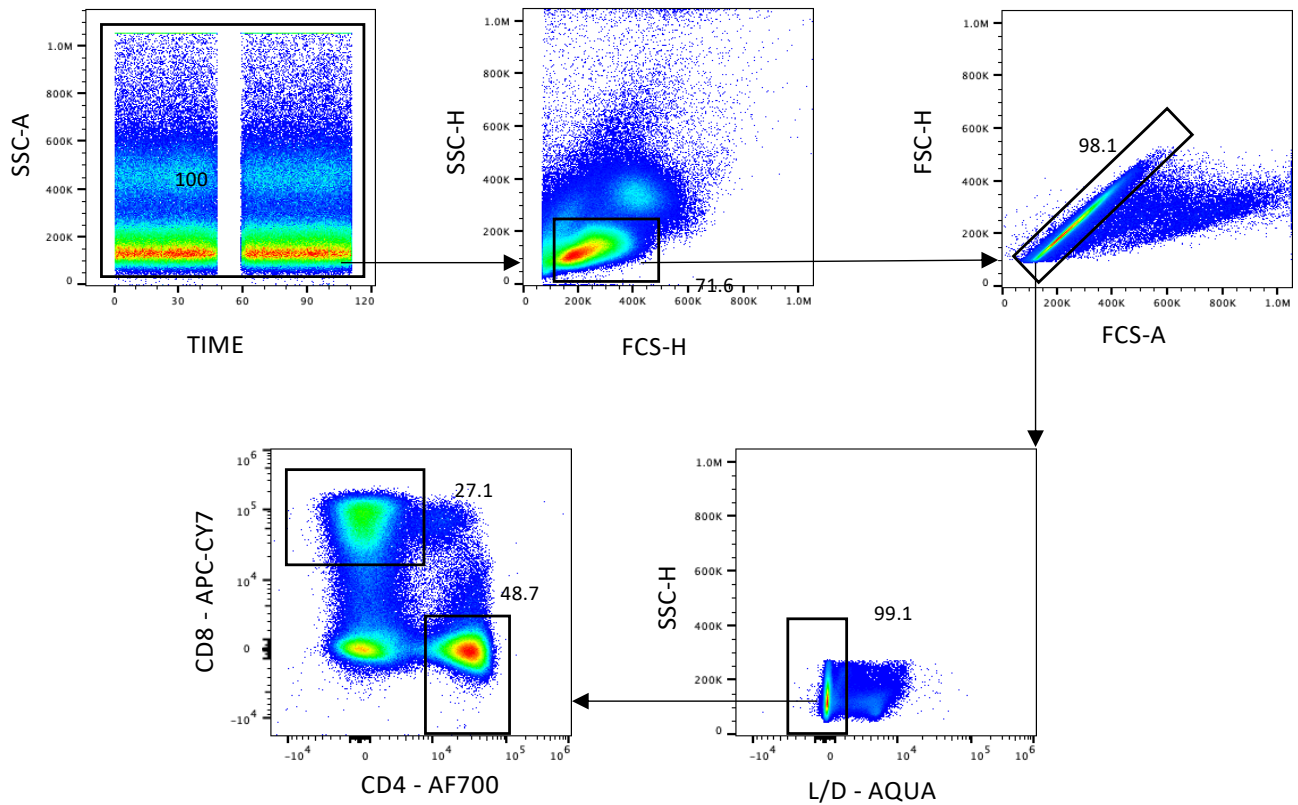

#### Supplementary Figure 4. Analysis of master regulator genes and chemokine receptors.

The figure shows the gating strategy used for detecting the expression of TH1-TH2-TH17 master regulator genes and chemokine receptors on CD4<sup>+</sup> and CD8<sup>+</sup> T cells. Fluidic perturbancies were excluded from the analysis by the SSC-A vs Time gate, then lymphocyte were selected according to physical parameters. Doubles were removed according to FSC-A vs FSC-H gate and in this population live lymphocyte were selected. CD4<sup>+</sup> and CD8<sup>+</sup> T cells were identified according to the positivity of these markers. Boundaries between positive and negative were selected according to single stained tube and fluorescent minus one controls (FMO).



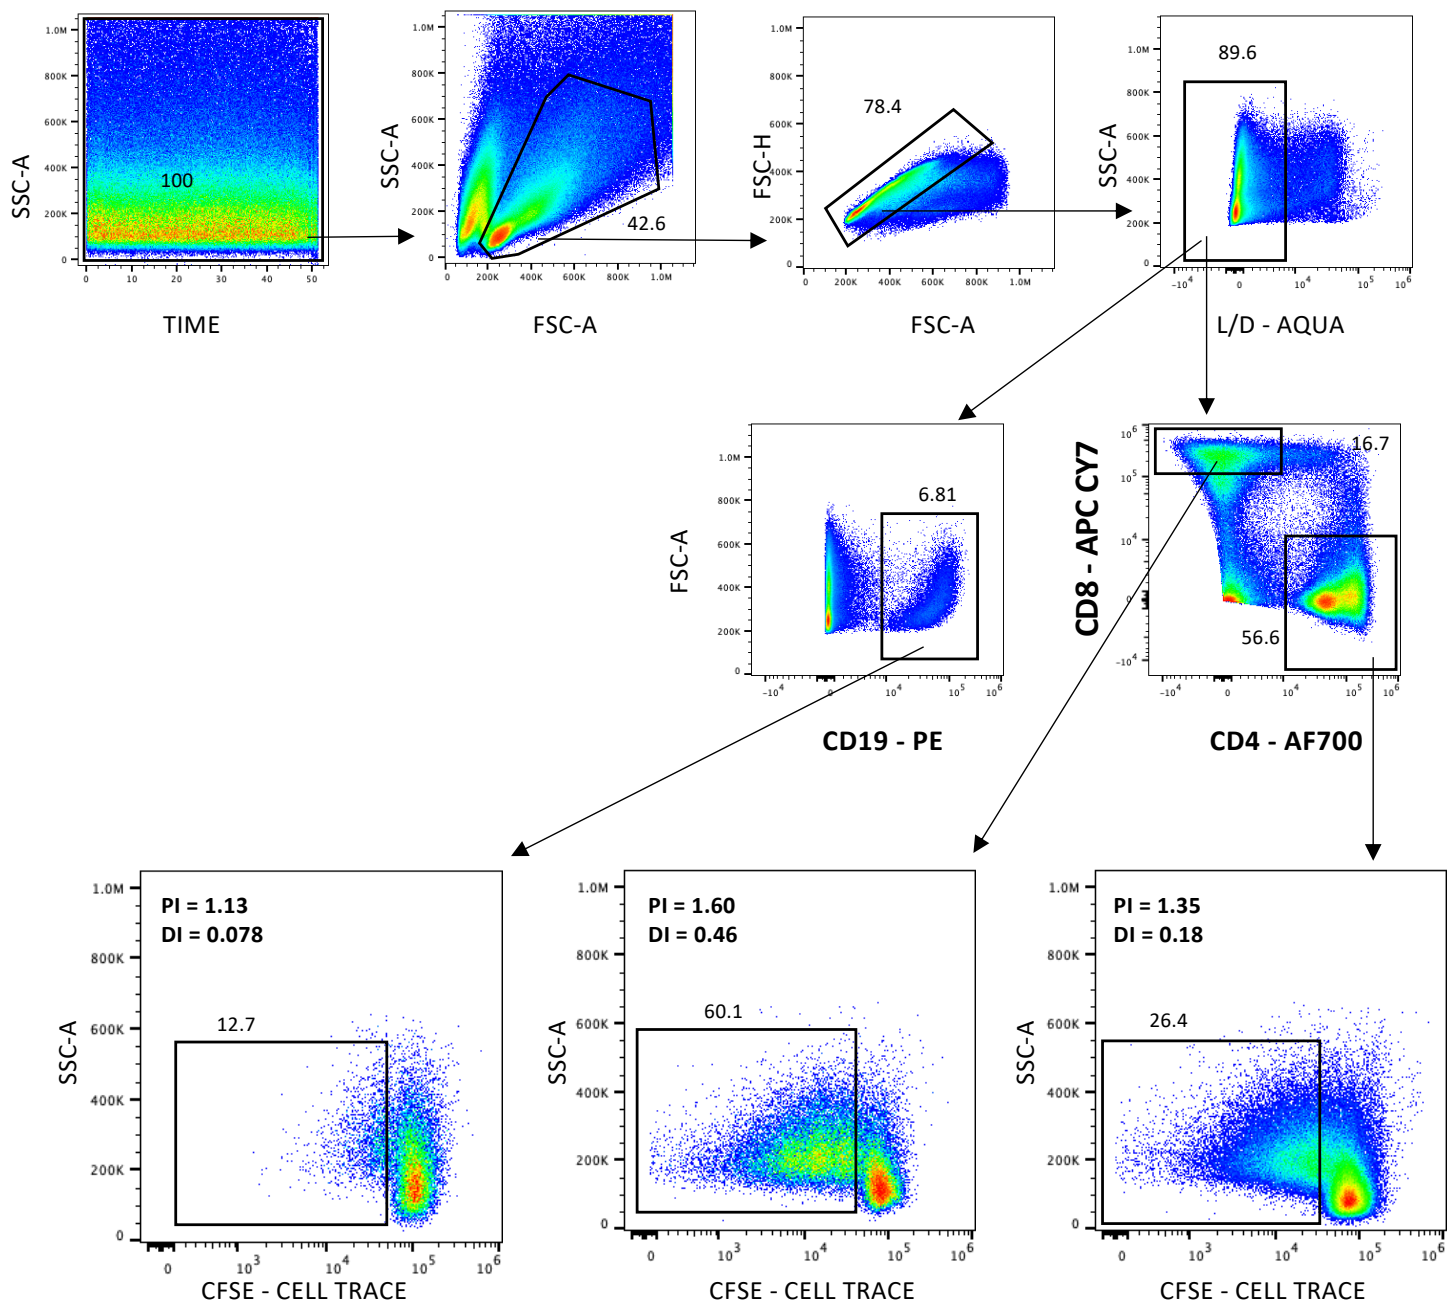

### Supplementary Figure 5. Single cell analysis of T and B cell proliferative capability.

The figure shows the gating strategy used for the analysis of cell proliferation. Fluidic perturbancies were excluded from the analysis by the SSC-A vs Time gate, then lymphocyte were selected according to physical parameters. Doubles were removed according to FSC-A vs FSC-H gate. Among living cells (AQUA-negative), we identified B lymphocytes (CD19<sup>+</sup>), helper (CD4<sup>+</sup>) and cytotoxic (CD8<sup>+</sup>) T cells. Then, we detected the proliferative capability of each cell population.

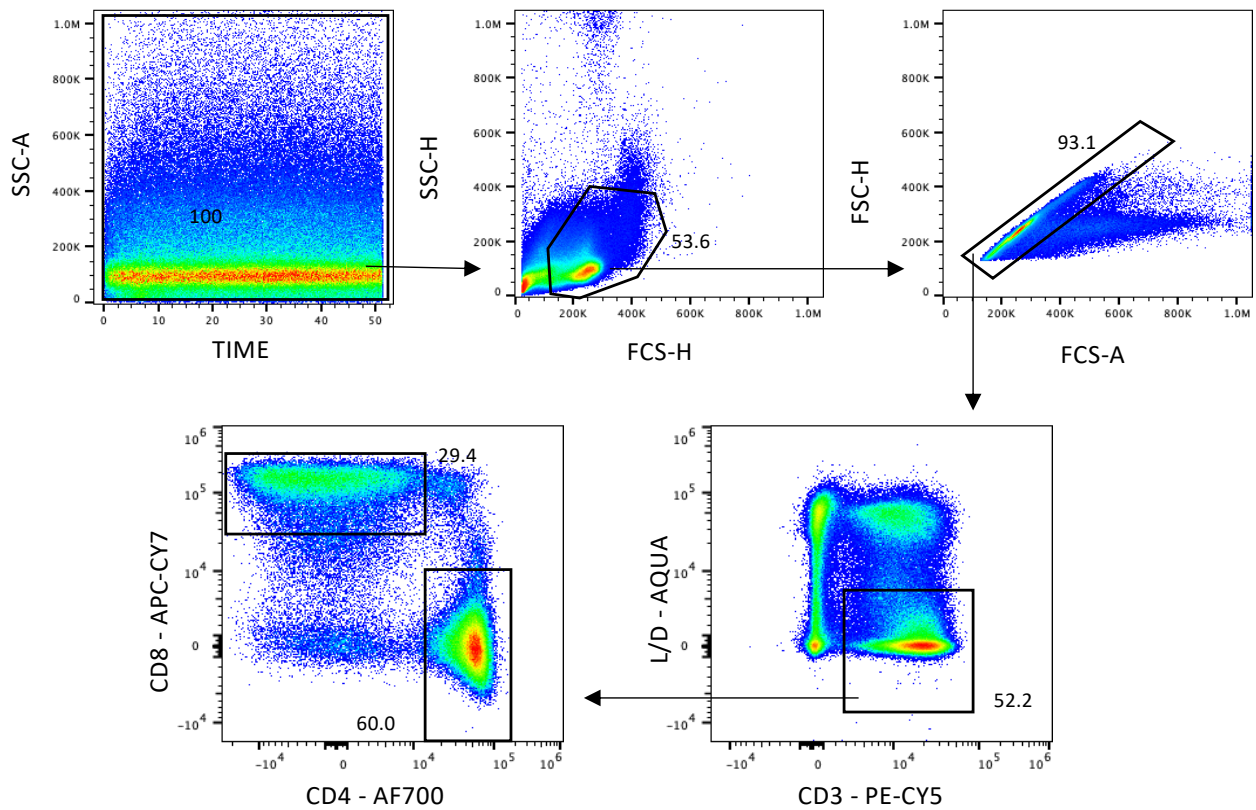

**Supplementary Figure 6. Representative example of cytokine production by CD4<sup>+</sup> and CD8<sup>+</sup> T cells.** The figure shows the gating strategy used for the identification of CD4<sup>+</sup> and CD8<sup>+</sup> T lymphocytes (selected among AQUA-negative, CD3<sup>+</sup> cells) that produce different types of cytokines. Fluidic perturbancies were excluded from the analysis by the SSC-A vs Time gate, then lymphocytes were selected according to physical parameters. Doubles were removed according to FSC-A vs FSC-H gate. Living CD3<sup>+</sup> T lymphocytes were selected and in this population CD4<sup>+</sup> and CD8<sup>+</sup> T lymphocytes were identified.

LDN

PREGNANT  
NEGATIVE

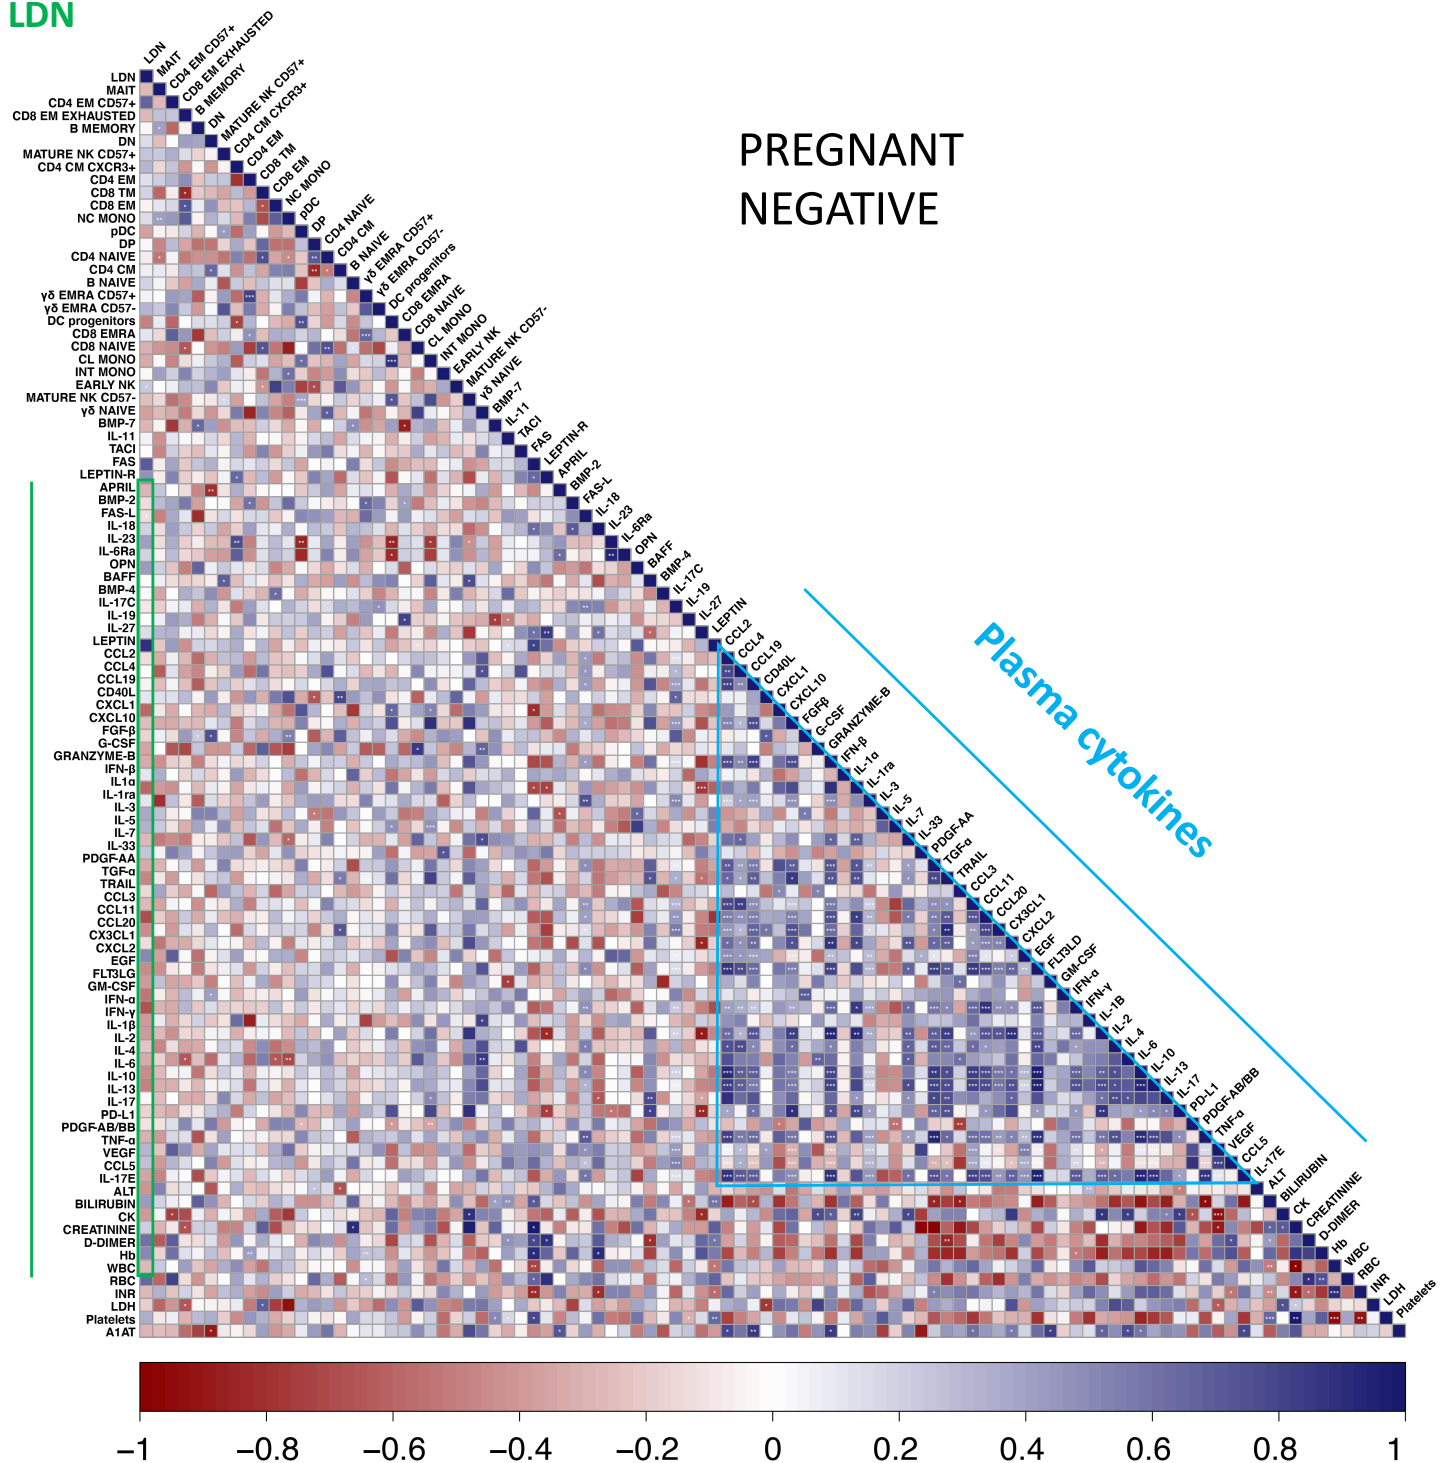

**Supplementary Figure 7.** Correlogram of pregnant negative women (PN). Spearman R values are shown from red (-1.0) to blue (1.0); r values are indicated by color. Additional information on feature names are described in the STAR Methods. Blank fields with dots indicate lack of signal. Spearman rank two-tailed p-value was indicated by \*P < 0.05, \*\*P < 0.01, and \*\*\*P < 0.001.
